# Supplementary figures and images for: Interplay of RAP2 GTPase and the cytoskeleton in Hippo pathway regulation
Source: PubMed Central journal article supplement — J Biol Chem. 2024 Apr 2;300(5):107257. doi: 10.1016/j.jbc.2024.107257 (PMC11067347; doi:10.1016/j.jbc.2024.107257), 2024-04-02

Supplemental Figure 1

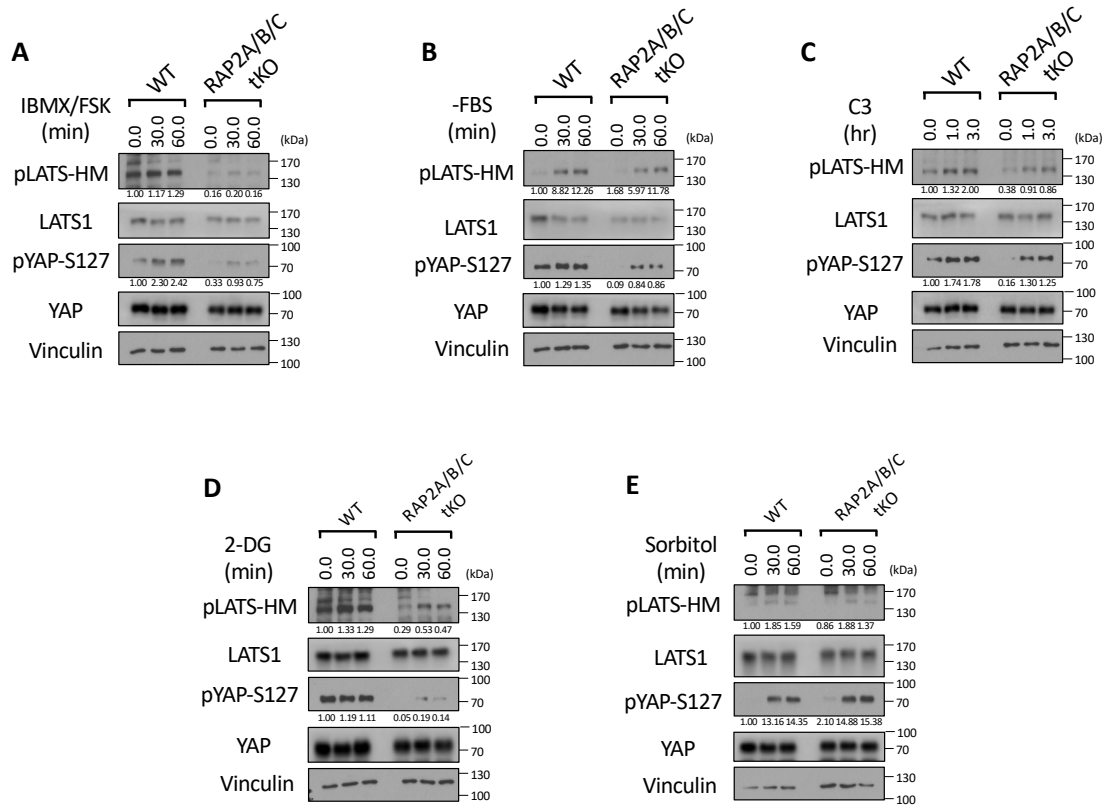

Supplement: mmc1.pdf [file mmc1.pdf]

Supplemental Figure 2

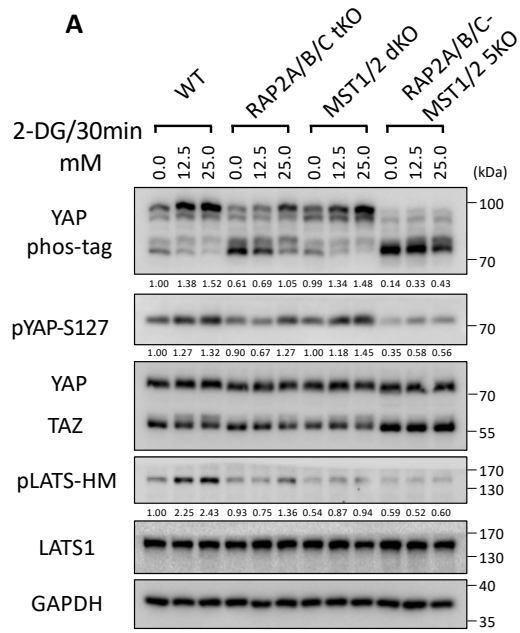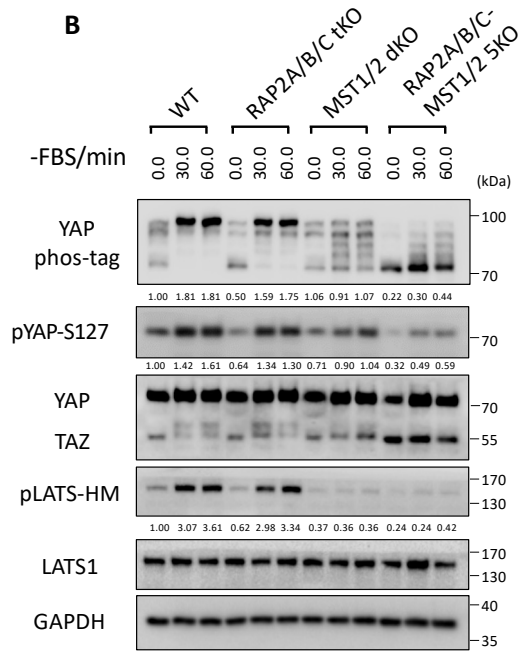

Supplement: mmc2.pdf [file mmc2.pdf]

### Supplemental Figure 3

**A**

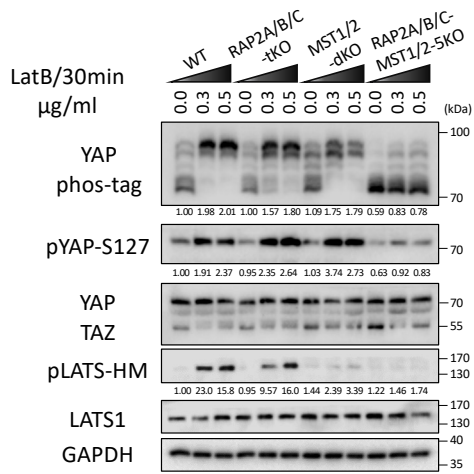

**B**

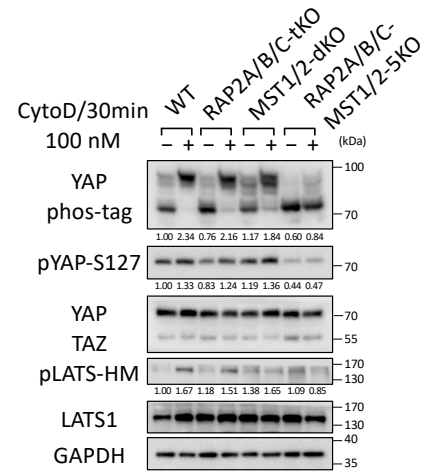

Supplement: mmc3.pdf [file mmc3.pdf]

Supplemental Figure 4

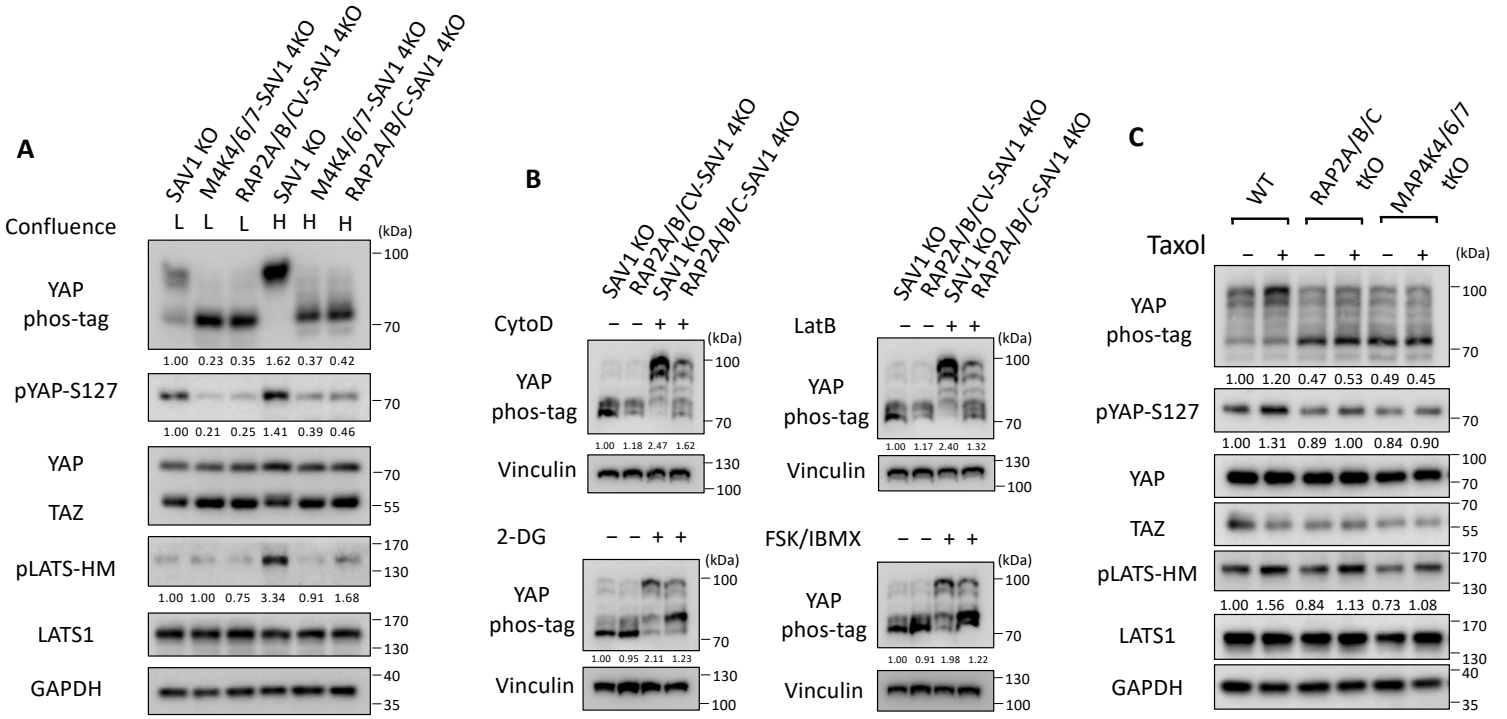

Supplement: mmc4.pdf [file mmc4.pdf]
